# Supplementary material
Source: publisher site journal article supplement (https://www.dovepress.com/get_supplementary_file.php?f=291867.docx)
Supplement: Supplementary file 1 [file get_supplementary_file.php]

**Supplementary Document** The relative foldchange of microRNAs significantly expressed in peripheral blood mononuclear cells from patients with active tuberculosis (n = 6) and normal volunteers (n = 3)

| microRNAs | Fold change (Mtb/Control) |
| --- | --- |
| hsa-let-7f-1* | 1.061907378 |
| hsa-miR-1275 | 0.827774132 |
| hsa-miR-128 | 0.877176428 |
| hsa-miR-129* | 0.972146729 |
| hsa-miR-129-3p | 1.150530077 |
| hsa-miR-130b | 0.563950696 |
| hsa-miR-148a | 1.492512222 |
| hsa-miR-16-2* | 3.629194506 |
| hsa-miR-196b | 2.795710308 |
| hsa-miR-199a-5p | 0.45417498 |
| hsa-miR-199b-5p | 5.579383361 |
| hsa-miR-26b* | 5.857171789 |
| hsa-miR-28-5p | 0.588988422 |
| hsa-miR-296-5p | 1.019807854 |
| hsa-miR-29a* | 0.408162391 |
| hsa-miR-30e | 0.796848906 |
| hsa-miR-30e* | 1.293865769 |
| hsa-miR-320a | 0.632147181 |
| hsa-miR-324-3p | 0.869073827 |
| hsa-miR-324-5p | 0.672960294 |
| hsa-miR-326 | 0.605301771 |
| hsa-miR-331-3p | 0.738779439 |
| hsa-miR-335 | 1.187189621 |
| hsa-miR-338-3p | 1.447104923 |
| hsa-miR-33b* | 3.030137691 |
| hsa-miR-340-5p | 0.222184237 |
| hsa-miR-342-5p | 0.46167949 |
| hsa-miR-361-3p | 1.744676361 |
| hsa-miR-361-5p | 22.97677642 |
| hsa-miR-362-3p | 2.684335526 |
| hsa-miR-374b | 0.762930305 |
| hsa-miR-374b* | 2.227354121 |
| hsa-miR-505 | 1.449082603 |
| hsa-miR-550 | 0.920748532 |
| hsa-miR-590-5p | 0.700449682 |
| hsa-miR-591 | 0.193484895 |
| hsa-miR-553 | 2.557850593 |
| hsa-miR-557 | 1.874244945 |
| hsa-miR-602 | 0.519321384 |
| hsa-miR-613 | 0.89544623 |
| hsa-miR-615-3p | 1.325417085 |
| hsa-miR-624 | 1.271673865 |
| hsa-miR-625 | 0.746991927 |
| hsa-miR-634 | 1.042375887 |
| hsa-miR-638 | 1.045484049 |
| hsa-miR-652 | 0.640081851 |
| hsa-miR-654-3p | 0.436155653 |
| hsa-miR-660 | 2.442322864 |
| hsa-miR-7 | 1.812841466 |
| hsa-miR-766 | 0.84601126 |

**Note:** hsa,homo sapiens.
